# Supplementary material for: A novel ab initio identification system of transcriptional regulation motifs in genome DNA sequences based on direct comparison scheme of signal/noise distributions
Source: PubMed Central journal article supplement — Nucleic Acids Res. 2012 Jul 13;40(18):8835–48. doi: 10.1093/nar/gks642 (PMC3467046; doi:10.1093/nar/gks642), 2012-07-13
Supplement: supp_gks642_nar-02822-n-2011-File011.pdf [file supp_gks642_nar-02822-n-2011-File011.pdf]

Supporting material for

**Parameter-tuning-free identification system of transcriptional regulation motifs in genome DNA sequences based on direct comparison scheme of signal/noise distributions**

Ryo Nakaki<sup>1</sup>, Jiyoung Kang<sup>1</sup>, and Masaru Tateno<sup>2</sup>

<sup>1</sup> Graduate School of Pure Applied Science, University of Tsukuba, 1-1-1 Tennodai, Tsukuba Science City, Ibaraki 305-8577, Japan

<sup>2</sup> Graduate School of Life Science, University of Hyogo, 3-2-1 Kouto, Kamigori, Ako, Hyogo 678-1297, Japan

Corresponding should be addressed to *tateno@sci.u-hyogo.ac.jp*

***Table S1. The 65 yeast datasets exploited in this study and the number of DNA fragments in each dataset***

To evaluate the accuracy of the six programs (the five existing programs and ours), 65 datasets, which were experimentally extracted from the yeast genome DNA sequences by using the ChIP-on-chip technique in the previous study (1), were exploited. The number of DNA fragments involved in each dataset is distinct.

***Table S2. The experimental conditions of the datasets that were used for the identification of mammalian TFBMs in the present study***

The accuracy of our system was tested with the use of four mammalian datasets extracted by ChIP-on-chip and ChIP-seq techniques.

***Tables S3-S16. Results of the TFBM identification using the six programs***

Identification of TFBMs was performed under the following conditions: 1) The reduction of SSRs using RepeatMasker (<http://www.repeatmasker.org/>) was performed or not. 2) For MDscan, the sequences in either the descending or unsorted order were utilized.

Then, “logo”, which represents information contents of the identified PSSMs, was generated by Weblogo (2) for each identified TFBM. Also, the frequency of each identified TFBM (the cluster sizes in our system), the (maximum) correlation coefficient between the corresponding elements of the obtained and reference PSSMs (see the text), the rank, and the identified TFBM are shown in Tables S3-S16.

***Table S17. The top rank motifs that were identified using the six programs, with respect to the four mammalian datasets.***

***Figure S1. Determination of R value***

For the determination of the most suitable  $R$  value (i.e., the ratio of “noise”; see subsection 2.5), various  $R$  values were tested.

***Figures S2-S7. The cumulative frequencies of “Ranks 1-5” of the 65 datasets, with respect to the six programs under the various conditions***

The cumulative frequency  $c(r)$  ( $r$  represents “Rank”, i.e.,  $r=1, \dots, 5$ ) in equation 13 is plotted with respect to the six programs executed under various conditions.

Table S1. The 65 yeast datasets exploited in this study, and the number of DNA fragments in each dataset.

| TF    | File name       | Number of fragments <sup>a</sup> |  | TF      | File name       | Number of fragments |
|-------|-----------------|----------------------------------|--|---------|-----------------|---------------------|
| ABF1  | ABF1_YPD.fsa    | 177                              |  | RAP1    | RAP1_YPD.fsa    | 108                 |
| ACE2  | ACE2_YPD.fsa    | 70                               |  | RCS1    | RCS1_H2O2Hi.fsa | 40                  |
| AFT2  | AFT2_H2O2Lo.fsa | 75                               |  | RDS1    | RDS1_H2O2Hi.fsa | 48                  |
| AZF1  | AZF1_YPD.fsa    | 23                               |  | REB1    | REB1_YPD.fsa    | 98                  |
| BAS1  | BAS1_SM.fsa     | 16                               |  | RFX1    | RFX1_YPD.fsa    | 24                  |
| CAD1  | CAD1_YPD.fsa    | 28                               |  | RLR1    | RLR1_YPD.fsa    | 34                  |
| CBF1  | CBF1_SM.fsa     | 194                              |  | RPN4    | RPN4_H2O2Lo.fsa | 69                  |
| CIN5  | CIN5_H2O2Lo.fsa | 117                              |  | SFP1    | SFP1_SM.fsa     | 36                  |
| DAL82 | DAL82_SM.fsa    | 61                               |  | SIG1    | SIG1_H2O2Hi.fsa | 15                  |
| DIG1  | DIG1_YPD.fsa    | 65                               |  | SIP4    | SIP4_SM.fsa     | 23                  |
| FHL1  | FHL1_YPD.fsa    | 130                              |  | SKN7    | SKN7_H2O2Lo.fsa | 147                 |
| FKH1  | FKH1_YPD.fsa    | 103                              |  | SNT2    | SNT2_YPD.fsa    | 45                  |
| FKH2  | FKH2_YPD.fsa    | 90                               |  | SOK2    | SOK2_BUT14.fsa  | 72                  |
| GAL4  | GAL4_RAFF.fsa   | 36                               |  | SPT23   | SPT23_YPD.fsa   | 47                  |
| GAT1  | GAT1_RAPA.fsa   | 48                               |  | SPT2    | SPT2_YPD.fsa    | 52                  |
| GCN4  | GCN4_SM.fsa     | 142                              |  | STB1    | STB1_YPD.fsa    | 22                  |
| GLN3  | GLN3_RAPA.fsa   | 78                               |  | STB4    | STB4_YPD.fsa    | 27                  |
| HAP1  | HAP1_YPD.fsa    | 131                              |  | STB5    | STB5_YPD.fsa    | 43                  |
| HAP4  | HAP4_YPD.fsa    | 53                               |  | STE12   | STE12_Alpha.fsa | 141                 |
| HSF1  | HSF1_H2O2Lo.fsa | 73                               |  | SUM1    | SUM1_YPD.fsa    | 50                  |
| INO2  | INO2_YPD.fsa    | 34                               |  | SUT1    | SUT1_YPD.fsa    | 75                  |
| INO4  | INO4_YPD.fsa    | 31                               |  | SWI4    | SWI4_YPD.fsa    | 129                 |
| LEU3  | LEU3_SM.fsa     | 31                               |  | SWI6    | SWI6_YPD.fsa    | 120                 |
| MBP1  | MBP1_H2O2Hi.fsa | 91                               |  | TEC1    | TEC1_YPD.fsa    | 36                  |
| MCM1  | MCM1_Alpha.fsa  | 76                               |  | THI2    | THI2_Thi.fsa    | 48                  |
| MET4  | MET4_SM.fsa     | 36                               |  | TYE7    | TYE7_YPD.fsa    | 65                  |
| MSN2  | MSN2_H2O2Hi.fsa | 73                               |  | UME1    | UME1_YPD.fsa    | 35                  |
| NDD1  | NDD1_YPD.fsa    | 93                               |  | UME6    | UME6_YPD.fsa    | 92                  |
| NRG1  | NRG1_H2O2Hi.fsa | 107                              |  | YAP1    | YAP1_H2O2Lo.fsa | 36                  |
| PDR1  | PDR1_YPD.fsa    | 67                               |  | YAP7    | YAP7_H2O2Hi.fsa | 100                 |
| PHD1  | PHD1_BUT90.fsa  | 102                              |  | YDR026c | YDR026c_YPD.fsa | 14                  |
| PHO2  | PHO2_H2O2Hi.fsa | 13                               |  | ZAP1    | ZAP1_YPD.fsa    | 17                  |
| PHO4  | PHO4_Pi.fsa     | 23                               |  |         |                 |                     |

<sup>a</sup> The number of target DNA fragments involved in each dataset.

Table S2. The experimental conditions of the datasets used for mammalian TFBM identification in the present study.

| TF                       | Species | Experimental technique <sup>a</sup> | Number of DNA fragments <sup>b</sup> | Reference                                        | Reference TFBM <sup>c</sup> (JASPAR ID <sup>d</sup> )                                             |
|--------------------------|---------|-------------------------------------|--------------------------------------|--------------------------------------------------|---------------------------------------------------------------------------------------------------|
| Estrogen receptor (ER)   | human   | ChIP-on-chip                        | 1910                                 | <i>Nat Genet</i> , <b>38</b> , 1289-1297 (2006)  | 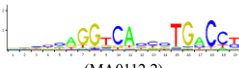<br>(MA0112.2) |
| Tcfcp2l1                 | mouse   | ChIP-seq                            | 3842                                 | <i>Cell</i> , <b>133</b> , 1106-1117 (2008)      | <br>(MA0145.1) |
| Androgen receptor (AR)   | human   | ChIP-seq                            | 1160                                 | <i>EMBO J</i> , <b>30</b> , 3962-3976 (2011)     | <br>(MA0007.1) |
| Vitamin D receptor (VDR) | human   | ChIP-seq                            | 461                                  | <i>Genome Res</i> , <b>20</b> , 1352-1360 (2010) | <br>(MA0074.1) |

<sup>a</sup> The experimental techniques used for the identification of each TFBM.

<sup>b</sup> The number of DNA fragments of chromosomes 1 and 2.

<sup>c</sup> TFBMs used as the reference.

<sup>d</sup> The JASPAR ID for each reference TFBM.

Table S3. The identification results of our system, without any dataset pre-treatments.

| TF    | Identified motif | Frequency | Correlation coefficient | Rank | TF      | Identified motif | Frequency | Correlation coefficient | Rank |
|-------|------------------|-----------|-------------------------|------|---------|------------------|-----------|-------------------------|------|
| ABF1  |                  | 211       | 0.9201                  | 1    | RAP1    |                  | 143       | 0.9554                  | 1    |
| ACE2  | -                | -         | -                       | DA   | RCS1    |                  | 67        | 0.9808                  | 1    |
| AFT2  |                  | 101       | 0.911                   | 1    | RDS1    |                  | 29        | 0.9801                  | 1    |
| AZF1  | -                | -         | -                       | DA   | REB1    |                  | 133       | 0.9781                  | 1    |
| BAS1  |                  | 28        | 0.9529                  | 1    | RFX1    |                  | 32        | 0.8853                  | 1    |
| CAD1  | -                | -         | -                       | DA   | RLR1    |                  | 123       | 0.8936                  | 1    |
| CBF1  |                  | 274       | 0.98                    | 1    | RPN4    |                  | 101       | 0.9914                  | 1    |
| CIN5  |                  | 161       | 0.9337                  | 1    | SFP1    |                  | 58        | 0.9762                  | 1    |
| DAL82 |                  | 68        | 0.9611                  | 2    | SIG1    | -                | -         | -                       | DA   |
| DIG1  |                  | 107       | 0.9803                  | 1    | SIP4    |                  | 24        | 0.8098                  | 2    |
| FHL1  |                  | 172       | 0.9011                  | 1    | SKN7    |                  | 116       | 0.8382                  | 1    |
| FKH1  |                  | 268       | 0.9698                  | 1    | SNT2    |                  | 35        | 0.986                   | 1    |
| FKH2  |                  | 146       | 0.9778                  | 1    | SOK2    |                  | 104       | 0.9367                  | 1    |
| GAL4  |                  | 49        | 0.8195                  | 1    | SPT23   |                  | 108       | 0.96                    | 2    |
| GAT1  |                  | 74        | 0.8858                  | 4    | SPT2    | -                | -         | -                       | DA   |
| GCN4  |                  | 207       | 0.9481                  | 1    | STB1    |                  | 68        | 0.8694                  | 1    |
| GLN3  |                  | 130       | 0.9214                  | 1    | STB4    |                  | 37        | 0.8653                  | 1    |
| HAP1  |                  | 151       | 0.8346                  | 1    | STB5    |                  | 55        | 0.944                   | 1    |
| HAP4  |                  | 81        | 0.9561                  | 1    | STE12   |                  | 331       | 0.9748                  | 1    |
| HSF1  |                  | 100       | 0.851                   | 1    | SUM1    |                  | 39        | 0.8396                  | 2    |
| INO2  |                  | 55        | 0.99                    | 1    | SUT1    |                  | 76        | 0.9077                  | 2    |
| INO4  |                  | 52        | 0.9694                  | 1    | SWI4    |                  | 194       | 0.98                    | 1    |
| LEU3  |                  | 33        | 0.8578                  | 1    | SWI6    |                  | 194       | 0.8278                  | 1    |
| MBP1  |                  | 163       | 0.9325                  | 1    | TEC1    |                  | 49        | 0.9156                  | 1    |
| MCM1  |                  | 220       | 0.9234                  | 1    | THI2    | -                | -         | -                       | DA   |
| MET4  |                  | 34        | 0.9233                  | 1    | TYE7    |                  | 82        | 0.955                   | 1    |
| MSN2  |                  | 88        | 0.981                   | 1    | UME1    | -                | -         | -                       | DA   |
| NDD1  | -                | -         | -                       | DA   | UME6    |                  | 146       | 0.9855                  | 1    |
| NRG1  |                  | 129       | 0.9811                  | 1    | YAP1    |                  | 36        | 0.901                   | 1    |
| PDR1  | -                | -         | -                       | DA   | YAP7    |                  | 176       | 0.9339                  | 1    |
| PHD1  |                  | 214       | 0.8417                  | 2    | YDR026c |                  | 17        | 0.996                   | 1    |
| PHO2  | -                | -         | -                       | DA   | ZAP1    |                  | 19        | 0.9518                  | 1    |
| PHO4  |                  | 41        | 0.9789                  | 1    |         |                  |           |                         |      |

Table S4. The identification results of our system, conducted after the SSR reduction.

| TF    | Identified motif | Frequency | Correlation coefficient | Rank | TF      | Identified motif | Frequency | Correlation coefficient | Rank |
|-------|------------------|-----------|-------------------------|------|---------|------------------|-----------|-------------------------|------|
| ABF1  |                  | 223       | 0.9269                  | 1    | RAP1    |                  | 153       | 0.9584                  | 1    |
| ACE2  |                  | 64        | 0.9038                  | 1    | RCS1    |                  | 64        | 0.979                   | 1    |
| AFT2  |                  | 103       | 0.9123                  | 1    | RDS1    |                  | 28        | 0.963                   | 1    |
| AZF1  | -                | -         | -                       | DA   | REB1    |                  | 134       | 0.9804                  | 1    |
| BAS1  |                  | 30        | 0.9495                  | 1    | RFX1    |                  | 30        | 0.8914                  | 1    |
| CAD1  |                  | 30        | 0.9356                  | 3    | RLR1    |                  | 114       | 0.899                   | 3    |
| CBF1  |                  | 272       | 0.9772                  | 1    | RPN4    |                  | 107       | 0.9914                  | 1    |
| CIN5  |                  | 146       | 0.9281                  | 2    | SFP1    |                  | 58        | 0.9747                  | 1    |
| DAL82 |                  | 69        | 0.9639                  | 2    | SIG1    | -                | -         | -                       | DA   |
| DIG1  |                  | 80        | 0.9723                  | 1    | SIP4    | -                | -         | -                       | DA   |
| FHL1  |                  | 171       | 0.9032                  | 1    | SKN7    |                  | 114       | 0.8397                  | 1    |
| FKH1  |                  | 248       | 0.971                   | 1    | SNT2    |                  | 37        | 0.9839                  | 1    |
| FKH2  |                  | 134       | 0.9751                  | 1    | SOK2    |                  | 104       | 0.9369                  | 1    |
| GAL4  | -                | -         | -                       | DA   | SPT23   |                  | 91        | 0.9479                  | 5    |
| GAT1  | -                | -         | -                       | DA   | SPT2    | -                | -         | -                       | DA   |
| GCN4  |                  | 220       | 0.9522                  | 1    | STB1    |                  | 48        | 0.935                   | 1    |
| GLN3  |                  | 126       | 0.9511                  | 1    | STB4    |                  | 28        | 0.8818                  | 2    |
| HAP1  |                  | 124       | 0.824                   | 1    | STB5    |                  | 52        | 0.9409                  | 1    |
| HAP4  |                  | 81        | 0.9561                  | 1    | STE12   |                  | 314       | 0.9769                  | 1    |
| HSF1  |                  | 98        | 0.8505                  | 1    | SUM1    |                  | 87        | 0.9277                  | 1    |
| INO2  |                  | 57        | 0.9912                  | 1    | SUT1    |                  | 79        | 0.9042                  | 3    |
| INO4  |                  | 50        | 0.9814                  | 1    | SW14    |                  | 149       | 0.9449                  | 1    |
| LEU3  |                  | 35        | 0.8652                  | 1    | SW16    |                  | 182       | 0.8306                  | 1    |
| MBP1  |                  | 175       | 0.9829                  | 1    | TEC1    |                  | 50        | 0.9171                  | 2    |
| MCM1  |                  | 213       | 0.9257                  | 1    | THI2    | -                | -         | -                       | DA   |
| MET4  |                  | 39        | 0.9275                  | 2    | TYE7    |                  | 62        | 0.9666                  | 1    |
| MSN2  |                  | 79        | 0.944                   | 1    | UME1    | -                | -         | -                       | DA   |
| NDD1  | -                | -         | -                       | DA   | UME6    |                  | 139       | 0.9857                  | 1    |
| NRG1  |                  | 118       | 0.9843                  | 1    | YAP1    |                  | 71        | 0.9312                  | 1    |
| PDR1  | -                | -         | -                       | DA   | YAP7    |                  | 151       | 0.9453                  | 1    |
| PHD1  |                  | 227       | 0.839                   | 2    | YDR026c |                  | 18        | 0.9952                  | 1    |
| PHO2  | -                | -         | -                       | DA   | ZAP1    |                  | 19        | 0.9518                  | 1    |
| PHO4  |                  | 35        | 0.9599                  | 1    |         |                  |           |                         |      |

Table S5. The identification results of MDscan, without any dataset pre-treatments.

| TF    | Frequency | Correlation coefficient | Rank |  | TF      | Frequency | Correlation coefficient | Rank |
|-------|-----------|-------------------------|------|--|---------|-----------|-------------------------|------|
| ABF1  | 205       | 0.8004                  | 1    |  | RAP1    | 144       | 0.9884                  | 1    |
| ACE2  | -         | -                       | DA   |  | RCS1    | 92        | 0.9514                  | 1    |
| AFT2  | 126       | 0.9676                  | 1    |  | RDS1    | -         | -                       | DA   |
| AZF1  | -         | -                       | DA   |  | REB1    | 95        | 0.9786                  | 1    |
| BAS1  | 34        | 0.9623                  | 1    |  | RFX1    | -         | -                       | DA   |
| CAD1  | -         | -                       | DA   |  | RLR1    | -         | -                       | DA   |
| CBF1  | 301       | 0.9802                  | 1    |  | RPN4    | 60        | 0.9982                  | 1    |
| CIN5  | -         | -                       | DA   |  | SFP1    | 53        | 0.9864                  | 1    |
| DAL82 | -         | -                       | DA   |  | SIG1    | -         | -                       | DA   |
| DIG1  | -         | -                       | DA   |  | SIP4    | -         | -                       | DA   |
| FHL1  | 176       | 0.9904                  | 1    |  | SKN7    | 286       | 0.8624                  | 2    |
| FKH1  | 139       | 0.9909                  | 1    |  | SNT2    | -         | -                       | DA   |
| FKH2  | -         | -                       | DA   |  | SOK2    | -         | -                       | DA   |
| GAL4  | -         | -                       | DA   |  | SPT23   | 104       | 0.9248                  | 1    |
| GAT1  | -         | -                       | DA   |  | SPT2    | -         | -                       | DA   |
| GCN4  | -         | -                       | DA   |  | STB1    | 45        | 0.9743                  | 1    |
| GLN3  | 115       | 0.9777                  | 1    |  | STB4    | -         | -                       | DA   |
| HAP1  | -         | -                       | DA   |  | STB5    | -         | -                       | DA   |
| HAP4  | 93        | 0.8413                  | 1    |  | STE12   | -         | -                       | DA   |
| HSF1  | -         | -                       | DA   |  | SUM1    | -         | -                       | DA   |
| INO2  | 81        | 0.8943                  | 1    |  | SUT1    | -         | -                       | DA   |
| INO4  | 51        | 0.9658                  | 1    |  | SWI4    | 173       | 0.9498                  | 2    |
| LEU3  | 53        | 0.9404                  | 1    |  | SWI6    | 253       | 0.9193                  | 1    |
| MBP1  | 202       | 0.9873                  | 1    |  | TEC1    | -         | -                       | DA   |
| MCM1  | 160       | 0.8057                  | 3    |  | THI2    | -         | -                       | DA   |
| MET4  | 52        | 0.813                   | 2    |  | TYE7    | 98        | 0.968                   | 1    |
| MSN2  | -         | -                       | DA   |  | UME1    | -         | -                       | DA   |
| NDD1  | -         | -                       | DA   |  | UME6    | 84        | 0.9947                  | 1    |
| NRG1  | -         | -                       | DA   |  | YAP1    | 90        | 0.8003                  | 1    |
| PDR1  | -         | -                       | DA   |  | YAP7    | 196       | 0.9828                  | 1    |
| PHD1  | 255       | 0.915                   | 1    |  | YDR026c | 17        | 0.9898                  | 1    |
| PHO2  | -         | -                       | DA   |  | ZAP1    | 43        | 0.909                   | 1    |
| PHO4  | 47        | 0.9792                  | 1    |  |         |           |                         |      |



Table S6. The identification results of MDscan, conducted after the rearrangement of the target DNA fragments.

| TF    | Frequency | Correlation coefficient | Rank |  | TF      | Frequency | Correlation coefficient | Rank |
|-------|-----------|-------------------------|------|--|---------|-----------|-------------------------|------|
| ABF1  | 281       | 0.9515                  | 1    |  | RAP1    | 139       | 0.9833                  | 1    |
| ACE2  | -         | -                       | DA   |  | RCS1    | 70        | 0.9763                  | 1    |
| AFT2  | 122       | 0.9837                  | 1    |  | RDS1    | 45        | 0.9981                  | 1    |
| AZF1  | 140       | 0.8768                  | 1    |  | REB1    | 85        | 0.98                    | 1    |
| BAS1  | -         | -                       | DA   |  | RFX1    | 40        | 0.916                   | 1    |
| CAD1  | -         | -                       | DA   |  | RLR1    | -         | -                       | DA   |
| CBF1  | 296       | 0.9797                  | 1    |  | RPN4    | 65        | 0.9995                  | 1    |
| CIN5  | 174       | 0.9924                  | 1    |  | SFP1    | 57        | 0.9837                  | 1    |
| DAL82 | 114       | 0.9565                  | 1    |  | SIG1    | -         | -                       | DA   |
| DIG1  | 132       | 0.9785                  | 1    |  | SIP4    | 71        | 0.9551                  | 1    |
| FHL1  | 233       | 0.9643                  | 1    |  | SKN7    | 251       | 0.9126                  | 1    |
| FKH1  | 148       | 0.993                   | 1    |  | SNT2    | 58        | 0.9076                  | 1    |
| FKH2  | 151       | 0.9234                  | 1    |  | SOK2    | -         | -                       | DA   |
| GAL4  | 45        | 0.8646                  | 2    |  | SPT23   | -         | -                       | DA   |
| GAT1  | -         | -                       | DA   |  | SPT2    | -         | -                       | DA   |
| GCN4  | 253       | 0.965                   | 1    |  | STB1    | 60        | 0.9341                  | 1    |
| GLN3  | 100       | 0.9593                  | 1    |  | STB4    | 33        | 0.9032                  | 1    |
| HAP1  | -         | -                       | DA   |  | STB5    | 60        | 0.9859                  | 2    |
| HAP4  | 81        | 0.9405                  | 5    |  | STE12   | 225       | 0.9695                  | 1    |
| HSF1  | 97        | 0.8429                  | 1    |  | SUM1    | 81        | 0.9441                  | 1    |
| INO2  | 52        | 0.9942                  | 2    |  | SUT1    | 185       | 0.9005                  | 1    |
| INO4  | 52        | 0.9843                  | 1    |  | SWI4    | 277       | 0.8207                  | 1    |
| LEU3  | 46        | 0.9891                  | 1    |  | SWI6    | 192       | 0.8849                  | 1    |
| MBP1  | 206       | 0.9831                  | 1    |  | TEC1    | -         | -                       | DA   |
| MCM1  | 167       | 0.9322                  | 1    |  | THI2    | -         | -                       | DA   |
| MET4  | -         | -                       | DA   |  | TYE7    | 87        | 0.9932                  | 1    |
| MSN2  | 131       | 0.8591                  | 1    |  | UME1    | -         | -                       | DA   |
| NDD1  | -         | -                       | DA   |  | UME6    | 80        | 0.9945                  | 1    |
| NRG1  | 173       | 0.871                   | 1    |  | YAP1    | 83        | 0.8166                  | 5    |
| PDR1  | -         | -                       | DA   |  | YAP7    | 196       | 0.9967                  | 1    |
| PHD1  | 236       | 0.9116                  | 1    |  | YDR026c | 41        | 0.8427                  | 1    |
| PHO2  | -         | -                       | DA   |  | ZAP1    | 39        | 0.8543                  | 1    |
| PHO4  | 38        | 0.9605                  | 1    |  |         |           |                         |      |

Table S7. The identification results of MDscan, conducted after the SSR reduction.

| TF    | Frequency | Correlation coefficient | Rank |  | TF      | Frequency | Correlation coefficient | Rank |
|-------|-----------|-------------------------|------|--|---------|-----------|-------------------------|------|
| ABF1  | -         | -                       | DA   |  | RAP1    | 127       | 0.9585                  | 1    |
| ACE2  | -         | -                       | DA   |  | RCS1    | -         | -                       | DA   |
| AFT2  | 140       | 0.9717                  | 1    |  | RDS1    | 48        | 0.9967                  | 1    |
| AZF1  | -         | -                       | DA   |  | REB1    | 84        | 0.9798                  | 1    |
| BAS1  | 45        | 0.9078                  | 1    |  | RFX1    | 53        | 0.8599                  | 1    |
| CAD1  | 58        | 0.978                   | 1    |  | RLR1    | -         | -                       | DA   |
| CBF1  | 300       | 0.9802                  | 1    |  | RPN4    | 65        | 0.9995                  | 1    |
| CIN5  | 157       | 0.9947                  | 1    |  | SFP1    | 55        | 0.9882                  | 1    |
| DAL82 | -         | -                       | DA   |  | SIG1    | -         | -                       | DA   |
| DIG1  | -         | -                       | DA   |  | SIP4    | -         | -                       | DA   |
| FHL1  | 176       | 0.9904                  | 1    |  | SKN7    | 290       | 0.8771                  | 1    |
| FKH1  | -         | -                       | DA   |  | SNT2    | 54        | 0.9441                  | 1    |
| FKH2  | 119       | 0.983                   | 1    |  | SOK2    | -         | -                       | DA   |
| GAL4  | -         | -                       | DA   |  | SPT23   | -         | -                       | DA   |
| GAT1  | -         | -                       | DA   |  | SPT2    | -         | -                       | DA   |
| GCN4  | 169       | 0.8675                  | 1    |  | STB1    | 56        | 0.9753                  | 1    |
| GLN3  | -         | -                       | DA   |  | STB4    | 47        | 0.825                   | 1    |
| HAP1  | 227       | 0.802                   | 5    |  | STB5    | -         | -                       | DA   |
| HAP4  | -         | -                       | DA   |  | STE12   | 249       | 0.9525                  | 1    |
| HSF1  | -         | -                       | DA   |  | SUM1    | 84        | 0.9808                  | 1    |
| INO2  | 74        | 0.8987                  | 1    |  | SUT1    | 122       | 0.8211                  | 2    |
| INO4  | 58        | 0.9559                  | 1    |  | SWI4    | -         | -                       | DA   |
| LEU3  | 42        | 0.9947                  | 1    |  | SWI6    | 156       | 0.9386                  | 1    |
| MBP1  | 205       | 0.9835                  | 1    |  | TEC1    | -         | -                       | DA   |
| MCM1  | 139       | 0.8708                  | 1    |  | THI2    | -         | -                       | DA   |
| MET4  | -         | -                       | DA   |  | TYE7    | 61        | 0.9903                  | 1    |
| MSN2  | -         | -                       | DA   |  | UME1    | -         | -                       | DA   |
| NDD1  | -         | -                       | DA   |  | UME6    | 81        | 0.9952                  | 1    |
| NRG1  | -         | -                       | DA   |  | YAP1    | -         | -                       | DA   |
| PDR1  | -         | -                       | DA   |  | YAP7    | 145       | 0.8639                  | 1    |
| PHD1  | 174       | 0.8691                  | 2    |  | YDR026c | 24        | 0.955                   | 5    |
| PHO2  | 38        | 0.8287                  | 2    |  | ZAP1    | -         | -                       | DA   |
| PHO4  | 39        | 0.987                   | 1    |  |         |           |                         |      |

Table S8. The identification results of MDscan, conducted after the SSR reduction and the rearrangement of the target DNA fragments.

| TF    | Frequency | Correlation coefficient | Rank |  | TF      | Frequency | Correlation coefficient | Rank |
|-------|-----------|-------------------------|------|--|---------|-----------|-------------------------|------|
| ABF1  | 289       | 0.9512                  | 1    |  | RAP1    | 145       | 0.9822                  | 1    |
| ACE2  | -         | -                       | DA   |  | RCS1    | 66        | 0.9774                  | 1    |
| AFT2  | 126       | 0.9818                  | 1    |  | RDS1    | 55        | 0.9982                  | 1    |
| AZF1  | -         | -                       | DA   |  | REB1    | 84        | 0.9798                  | 1    |
| BAS1  | 42        | 0.92                    | 1    |  | RFX1    | 44        | 0.9514                  | 1    |
| CAD1  | 65        | 0.984                   | 3    |  | RLR1    | -         | -                       | DA   |
| CBF1  | 276       | 0.9737                  | 1    |  | RPN4    | 65        | 0.9995                  | 1    |
| CIN5  | 170       | 0.993                   | 1    |  | SFP1    | 60        | 0.9828                  | 1    |
| DAL82 | 113       | 0.958                   | 1    |  | SIG1    | -         | -                       | DA   |
| DIG1  | 129       | 0.9468                  | 2    |  | SIP4    | 66        | 0.9475                  | 1    |
| FHL1  | 227       | 0.9666                  | 1    |  | SKN7    | 279       | 0.9184                  | 1    |
| FKH1  | 145       | 0.9906                  | 1    |  | SNT2    | 57        | 0.9085                  | 1    |
| FKH2  | 165       | 0.9142                  | 1    |  | SOK2    | -         | -                       | DA   |
| GAL4  | 56        | 0.8669                  | 3    |  | SPT23   | -         | -                       | DA   |
| GAT1  | -         | -                       | DA   |  | SPT2    | -         | -                       | DA   |
| GCN4  | 254       | 0.965                   | 1    |  | STB1    | 59        | 0.9347                  | 1    |
| GLN3  | 178       | 0.9092                  | 1    |  | STB4    | 29        | 0.9291                  | 1    |
| HAP1  | -         | -                       | DA   |  | STB5    | 65        | 0.9826                  | 4    |
| HAP4  | 81        | 0.9405                  | 5    |  | STE12   | 217       | 0.9801                  | 1    |
| HSF1  | 94        | 0.8406                  | 1    |  | SUM1    | 84        | 0.9456                  | 1    |
| INO2  | 46        | 0.963                   | 1    |  | SUT1    | 185       | 0.902                   | 3    |
| INO4  | 46        | 0.9794                  | 1    |  | SWI4    | 289       | 0.8142                  | 1    |
| LEU3  | 58        | 0.9857                  | 1    |  | SWI6    | 193       | 0.8906                  | 1    |
| MBP1  | 206       | 0.983                   | 1    |  | TEC1    | -         | -                       | DA   |
| MCM1  | 130       | 0.9499                  | 1    |  | THI2    | -         | -                       | DA   |
| MET4  | -         | -                       | DA   |  | TYE7    | 89        | 0.9936                  | 1    |
| MSN2  | 138       | 0.855                   | 1    |  | UME1    | 94        | 0.8747                  | 2    |
| NDD1  | 231       | 0.8074                  | 3    |  | UME6    | 80        | 0.9945                  | 1    |
| NRG1  | 176       | 0.873                   | 1    |  | YAP1    | 80        | 0.885                   | 1    |
| PDR1  | -         | -                       | DA   |  | YAP7    | 195       | 0.9966                  | 1    |
| PHD1  | 273       | 0.9336                  | 1    |  | YDR026c | -         | -                       | DA   |
| PHO2  | -         | -                       | DA   |  | ZAP1    | 41        | 0.8591                  | 1    |
| PHO4  | 39        | 0.9589                  | 1    |  |         |           |                         |      |

Table S9. The identification results of BioProspector, without any dataset pre-treatments.

| TF    | Frequency | Correlation coefficient | Rank |  | TF      | Frequency | Correlation coefficient | Rank |
|-------|-----------|-------------------------|------|--|---------|-----------|-------------------------|------|
| ABF1  | -         | -                       | DA   |  | RAP1    | 106       | 0.9938                  | 1    |
| ACE2  | -         | -                       | DA   |  | RCS1    | 40        | 0.9842                  | 1    |
| AFT2  | 59        | 0.9806                  | 1    |  | RDS1    | 25        | 0.9631                  | 1    |
| AZF1  | -         | -                       | DA   |  | REB1    | 95        | 0.9802                  | 1    |
| BAS1  | 18        | 0.9505                  | 1    |  | RFX1    | 20        | 0.9324                  | 1    |
| CAD1  | -         | -                       | DA   |  | RLR1    | -         | -                       | DA   |
| CBF1  | 155       | 0.9742                  | 1    |  | RPN4    | 67        | 0.9994                  | 1    |
| CIN5  | 64        | 0.865                   | 1    |  | SFP1    | 40        | 0.9874                  | 1    |
| DAL82 | -         | -                       | DA   |  | SIG1    | -         | -                       | DA   |
| DIG1  | 34        | 0.8538                  | 3    |  | SIP4    | -         | -                       | DA   |
| FHL1  | 118       | 0.9907                  | 1    |  | SKN7    | 104       | 0.901                   | 1    |
| FKH1  | 94        | 0.9897                  | 1    |  | SNT2    | 23        | 0.9875                  | 1    |
| FKH2  | 60        | 0.9702                  | 1    |  | SOK2    | -         | -                       | DA   |
| GAL4  | -         | -                       | DA   |  | SPT23   | -         | -                       | DA   |
| GAT1  | -         | -                       | DA   |  | SPT2    | -         | -                       | DA   |
| GCN4  | 111       | 0.9693                  | 1    |  | STB1    | 24        | 0.9033                  | 1    |
| GLN3  | 50        | 0.9576                  | 1    |  | STB4    | 16        | 0.8984                  | 2    |
| HAP1  | 77        | 0.8925                  | 2    |  | STB5    | 28        | 0.9257                  | 1    |
| HAP4  | 40        | 0.9553                  | 1    |  | STE12   | 93        | 0.9806                  | 1    |
| HSF1  | 64        | 0.8253                  | 1    |  | SUM1    | 44        | 0.9577                  | 1    |
| INO2  | 36        | 0.9696                  | 1    |  | SUT1    | 51        | 0.8333                  | 3    |
| INO4  | 34        | 0.9663                  | 1    |  | SWI4    | 79        | 0.9357                  | 1    |
| LEU3  | 17        | 0.9787                  | 1    |  | SWI6    | 105       | 0.9346                  | 1    |
| MBP1  | 115       | 0.9717                  | 1    |  | TEC1    | 26        | 0.926                   | 1    |
| MCM1  | 54        | 0.9649                  | 1    |  | THI2    | -         | -                       | DA   |
| MET4  | -         | -                       | DA   |  | TYE7    | 49        | 0.9833                  | 1    |
| MSN2  | 48        | 0.9699                  | 1    |  | UME1    | -         | -                       | DA   |
| NDD1  | -         | -                       | DA   |  | UME6    | 96        | 0.9922                  | 1    |
| NRG1  | 84        | 0.9869                  | 1    |  | YAP1    | 34        | 0.9691                  | 1    |
| PDR1  | -         | -                       | DA   |  | YAP7    | 91        | 0.9458                  | 1    |
| PHD1  | -         | -                       | DA   |  | YDR026c | 13        | 0.992                   | 1    |
| PHO2  | -         | -                       | DA   |  | ZAP1    | 15        | 0.8591                  | 2    |
| PHO4  | 21        | 0.9659                  | 1    |  |         |           |                         |      |

Table S10. The identification results of BioProspector, conducted after the SSR reduction.

| TF    | Frequency | Correlation coefficient | Rank |  | TF      | Frequency | Correlation coefficient | Rank |
|-------|-----------|-------------------------|------|--|---------|-----------|-------------------------|------|
| ABF1  | -         | -                       | DA   |  | RAP1    | 107       | 0.9934                  | 1    |
| ACE2  | -         | -                       | DA   |  | RCS1    | 40        | 0.9842                  | 1    |
| AFT2  | 55        | 0.9431                  | 1    |  | RDS1    | 23        | 0.9522                  | 1    |
| AZF1  | -         | -                       | DA   |  | REB1    | 94        | 0.9805                  | 1    |
| BAS1  | 23        | 0.9492                  | 1    |  | RFX1    | 20        | 0.9263                  | 1    |
| CAD1  | 29        | 0.9902                  | 1    |  | RLR1    | -         | -                       | DA   |
| CBF1  | 142       | 0.9663                  | 1    |  | RPN4    | 65        | 0.9996                  | 1    |
| CIN5  | 68        | 0.9594                  | 1    |  | SFP1    | 43        | 0.9823                  | 1    |
| DAL82 | -         | -                       | DA   |  | SIG1    | -         | -                       | DA   |
| DIG1  | -         | -                       | DA   |  | SIP4    | -         | -                       | DA   |
| FHL1  | 137       | 0.9903                  | 1    |  | SKN7    | 105       | 0.9134                  | 1    |
| FKH1  | 90        | 0.9718                  | 1    |  | SNT2    | 22        | 0.9916                  | 1    |
| FKH2  | 91        | 0.9671                  | 1    |  | SOK2    | -         | -                       | DA   |
| GAL4  | -         | -                       | DA   |  | SPT23   | -         | -                       | DA   |
| GAT1  | -         | -                       | DA   |  | SPT2    | -         | -                       | DA   |
| GCN4  | 112       | 0.9698                  | 1    |  | STB1    | 29        | 0.9203                  | 1    |
| GLN3  | 48        | 0.9559                  | 1    |  | STB4    | 23        | 0.8177                  | 1    |
| HAP1  | -         | -                       | DA   |  | STB5    | 26        | 0.933                   | 1    |
| HAP4  | 40        | 0.9375                  | 1    |  | STE12   | 87        | 0.992                   | 1    |
| HSF1  | 51        | 0.8243                  | 2    |  | SUM1    | 45        | 0.8792                  | 1    |
| INO2  | 35        | 0.9621                  | 1    |  | SUT1    | 58        | 0.8712                  | 1    |
| INO4  | 29        | 0.9738                  | 1    |  | SWI4    | 94        | 0.9779                  | 1    |
| LEU3  | 22        | 0.9673                  | 1    |  | SWI6    | 90        | 0.9161                  | 1    |
| MBP1  | 114       | 0.9711                  | 1    |  | TEC1    | -         | -                       | DA   |
| MCM1  | 54        | 0.9636                  | 1    |  | THI2    | -         | -                       | DA   |
| MET4  | -         | -                       | DA   |  | TYE7    | 55        | 0.9744                  | 1    |
| MSN2  | 49        | 0.9813                  | 1    |  | UME1    | -         | -                       | DA   |
| NDD1  | -         | -                       | DA   |  | UME6    | 89        | 0.9934                  | 1    |
| NRG1  | 89        | 0.9851                  | 1    |  | YAP1    | 29        | 0.9824                  | 1    |
| PDR1  | -         | -                       | DA   |  | YAP7    | 82        | 0.8948                  | 1    |
| PHD1  | 75        | 0.8944                  | 2    |  | YDR026c | 14        | 0.9906                  | 1    |
| PHO2  | -         | -                       | DA   |  | ZAP1    | -         | -                       | DA   |
| PHO4  | 21        | 0.9567                  | 1    |  |         |           |                         |      |

Table S11. The identification results of MEME, without any dataset pre-treatments.

| TF    | Frequency | Correlation coefficient | Rank |  | TF      | Frequency | Correlation coefficient | Rank |
|-------|-----------|-------------------------|------|--|---------|-----------|-------------------------|------|
| ABF1  | -         | -                       | DA   |  | RAP1    | 72        | 0.958                   | 1    |
| ACE2  | -         | -                       | DA   |  | RCS1    | 18        | 0.9628                  | 1    |
| AFT2  | 52        | 0.951                   | 1    |  | RDS1    | 16        | 0.9693                  | 1    |
| AZF1  | -         | -                       | DA   |  | REB1    | 57        | 0.9752                  | 1    |
| BAS1  | 17        | 0.8644                  | 1    |  | RFX1    | 14        | 0.9662                  | 1    |
| CAD1  | -         | -                       | DA   |  | RLR1    | 30        | 0.8544                  | 2    |
| CBF1  | 168       | 0.9869                  | 1    |  | RPN4    | 40        | 0.9971                  | 1    |
| CIN5  | -         | -                       | DA   |  | SFP1    | 20        | 0.9785                  | 1    |
| DAL82 | -         | -                       | DA   |  | SIG1    | -         | -                       | DA   |
| DIG1  | -         | -                       | DA   |  | SIP4    | -         | -                       | DA   |
| FHL1  | 60        | 0.9893                  | 1    |  | SKN7    | 90        | 0.9787                  | 1    |
| FKH1  | 103       | 0.9879                  | 1    |  | SNT2    | 46        | 0.8717                  | 1    |
| FKH2  | -         | -                       | DA   |  | SOK2    | 28        | 0.8079                  | 2    |
| GAL4  | -         | -                       | DA   |  | SPT23   | -         | -                       | DA   |
| GAT1  | 2         | 0.8035                  | 4    |  | SPT2    | -         | -                       | DA   |
| GCN4  | 143       | 0.9591                  | 1    |  | STB1    | 14        | 0.8967                  | 1    |
| GLN3  | -         | -                       | DA   |  | STB4    | 5         | 0.856                   | 1    |
| HAP1  | -         | -                       | DA   |  | STB5    | -         | -                       | DA   |
| HAP4  | -         | -                       | DA   |  | STE12   | -         | -                       | DA   |
| HSF1  | 38        | 0.8417                  | 1    |  | SUM1    | 46        | 0.9621                  | 1    |
| INO2  | 32        | 0.945                   | 1    |  | SUT1    | 31        | 0.8322                  | 2    |
| INO4  | 32        | 0.9324                  | 1    |  | SWI4    | -         | -                       | DA   |
| LEU3  | 17        | 0.9772                  | 1    |  | SWI6    | 121       | 0.9357                  | 1    |
| MBP1  | 92        | 0.9888                  | 1    |  | TEC1    | -         | -                       | DA   |
| MCM1  | -         | -                       | DA   |  | THI2    | -         | -                       | DA   |
| MET4  | 5         | 0.8428                  | 1    |  | TYE7    | 37        | 0.9974                  | 1    |
| MSN2  | 2         | 0.8574                  | 2    |  | UME1    | -         | -                       | DA   |
| NDD1  | -         | -                       | DA   |  | UME6    | 47        | 0.9949                  | 1    |
| NRG1  | 40        | 0.977                   | 1    |  | YAP1    | -         | -                       | DA   |
| PDR1  | 3         | 0.8376                  | 2    |  | YAP7    | 101       | 0.9947                  | 1    |
| PHD1  | 15        | 0.9116                  | 3    |  | YDR026c | 11        | 0.9729                  | 1    |
| PHO2  | -         | -                       | DA   |  | ZAP1    | -         | -                       | DA   |
| PHO4  | 13        | 0.9531                  | 1    |  |         |           |                         |      |

Table S12. The identification results of MEME, conducted after the SSR reduction.

| TF    | Frequency | Correlation coefficient | Rank |  | TF      | Frequency | Correlation coefficient | Rank |
|-------|-----------|-------------------------|------|--|---------|-----------|-------------------------|------|
| ABF1  | -         | -                       | DA   |  | RAP1    | 72        | 0.958                   | 1    |
| ACE2  | -         | -                       | DA   |  | RCS1    | 18        | 0.9628                  | 1    |
| AFT2  | 29        | 0.9281                  | 1    |  | RDS1    | 16        | 0.9693                  | 1    |
| AZF1  | -         | -                       | DA   |  | REB1    | 62        | 0.9755                  | 1    |
| BAS1  | 17        | 0.8644                  | 1    |  | RFX1    | 13        | 0.9664                  | 1    |
| CAD1  | -         | -                       | DA   |  | RLR1    | -         | -                       | DA   |
| CBF1  | 163       | 0.9864                  | 1    |  | RPN4    | 40        | 0.9971                  | 1    |
| CIN5  | -         | -                       | DA   |  | SFP1    | 18        | 0.9757                  | 1    |
| DAL82 | -         | -                       | DA   |  | SIG1    | -         | -                       | DA   |
| DIG1  | -         | -                       | DA   |  | SIP4    | -         | -                       | DA   |
| FHL1  | 55        | 0.9892                  | 1    |  | SKN7    | 98        | 0.9818                  | 1    |
| FKH1  | 104       | 0.9849                  | 1    |  | SNT2    | 45        | 0.8692                  | 1    |
| FKH2  | -         | -                       | DA   |  | SOK2    | -         | -                       | DA   |
| GAL4  | -         | -                       | DA   |  | SPT23   | -         | -                       | DA   |
| GAT1  | 2         | 0.8035                  | 3    |  | SPT2    | -         | -                       | DA   |
| GCN4  | 124       | 0.9624                  | 1    |  | STB1    | 14        | 0.9036                  | 1    |
| GLN3  | -         | -                       | DA   |  | STB4    | 5         | 0.874                   | 1    |
| HAP1  | -         | -                       | DA   |  | STB5    | -         | -                       | DA   |
| HAP4  | -         | -                       | DA   |  | STE12   | 2         | 0.9668                  | 1    |
| HSF1  | 38        | 0.8417                  | 1    |  | SUM1    | 49        | 0.9138                  | 1    |
| INO2  | 30        | 0.9484                  | 1    |  | SUT1    | 31        | 0.8181                  | 2    |
| INO4  | 30        | 0.9336                  | 1    |  | SWI4    | 24        | 0.8211                  | 1    |
| LEU3  | 17        | 0.9772                  | 1    |  | SWI6    | 33        | 0.8272                  | 1    |
| MBP1  | 92        | 0.9909                  | 1    |  | TEC1    | -         | -                       | DA   |
| MCM1  | -         | -                       | DA   |  | THI2    | -         | -                       | DA   |
| MET4  | 4         | 0.8646                  | 1    |  | TYE7    | 38        | 0.9925                  | 1    |
| MSN2  | 2         | 0.8939                  | 4    |  | UME1    | -         | -                       | DA   |
| NDD1  | -         | -                       | DA   |  | UME6    | 47        | 0.9949                  | 1    |
| NRG1  | 40        | 0.977                   | 1    |  | YAP1    | -         | -                       | DA   |
| PDR1  | 18        | 0.967                   | 1    |  | YAP7    | -         | -                       | DA   |
| PHD1  | 16        | 0.8887                  | 5    |  | YDR026c | 11        | 0.9729                  | 1    |
| PHO2  | -         | -                       | DA   |  | ZAP1    | -         | -                       | DA   |
| PHO4  | 13        | 0.9531                  | 1    |  |         |           |                         |      |

Table S13. The identification results of DME, without any dataset pre-treatments.

| TF    | Frequency | Correlation coefficient | Rank |  | TF      | Frequency | Correlation coefficient | Rank |
|-------|-----------|-------------------------|------|--|---------|-----------|-------------------------|------|
| ABF1  | 18        | 0.888                   | 3    |  | RAP1    | 66        | 0.9831                  | 1    |
| ACE2  | 23        | 0.8852                  | 1    |  | RCS1    | 26        | 0.9883                  | 1    |
| AFT2  | 43        | 0.9603                  | 1    |  | RDS1    | 39        | 0.8589                  | 1    |
| AZF1  | 13        | 0.9365                  | 1    |  | REB1    | 89        | 0.9803                  | 1    |
| BAS1  | 9         | 0.8958                  | 1    |  | RFX1    | 12        | 0.9707                  | 1    |
| CAD1  | -         | -                       | DA   |  | RLR1    | 8         | 0.8477                  | 4    |
| CBF1  | 149       | 0.9694                  | 1    |  | RPN4    | 67        | 0.9991                  | 1    |
| CIN5  | 38        | 0.9575                  | 2    |  | SFP1    | 25        | 0.9814                  | 1    |
| DAL82 | -         | -                       | DA   |  | SIG1    | -         | -                       | DA   |
| DIG1  | 14        | 0.9287                  | 2    |  | SIP4    | -         | -                       | DA   |
| FHL1  | 89        | 0.9911                  | 1    |  | SKN7    | -         | -                       | DA   |
| FKH1  | 47        | 0.9713                  | 1    |  | SNT2    | 26        | 0.9496                  | 1    |
| FKH2  | 40        | 0.9714                  | 1    |  | SOK2    | -         | -                       | DA   |
| GAL4  | -         | -                       | DA   |  | SPT23   | -         | -                       | DA   |
| GAT1  | -         | -                       | DA   |  | SPT2    | -         | -                       | DA   |
| GCN4  | 56        | 0.9637                  | 1    |  | STB1    | 18        | 0.9047                  | 1    |
| GLN3  | 21        | 0.8598                  | 1    |  | STB4    | -         | -                       | DA   |
| HAP1  | -         | -                       | DA   |  | STB5    | 15        | 0.8997                  | 1    |
| HAP4  | 26        | 0.9735                  | 1    |  | STE12   | 47        | 0.9668                  | 1    |
| HSF1  | 28        | 0.8382                  | 1    |  | SUM1    | 21        | 0.9073                  | 1    |
| INO2  | 23        | 0.9578                  | 1    |  | SUT1    | -         | -                       | DA   |
| INO4  | 20        | 0.9819                  | 1    |  | SWI4    | 63        | 0.963                   | 1    |
| LEU3  | 22        | 0.9343                  | 1    |  | SWI6    | 74        | 0.8951                  | 1    |
| MBP1  | 65        | 0.9624                  | 1    |  | TEC1    | 11        | 0.8398                  | 1    |
| MCM1  | 26        | 0.9279                  | 1    |  | THI2    | -         | -                       | DA   |
| MET4  | 10        | 0.8482                  | 3    |  | TYE7    | 36        | 0.9821                  | 1    |
| MSN2  | 31        | 0.8937                  | 1    |  | UME1    | 10        | 0.8765                  | 3    |
| NDD1  | -         | -                       | DA   |  | UME6    | 74        | 0.9923                  | 1    |
| NRG1  | 63        | 0.9873                  | 1    |  | YAP1    | 17        | 0.9788                  | 1    |
| PDR1  | -         | -                       | DA   |  | YAP7    | 27        | 0.8429                  | 1    |
| PHD1  | -         | -                       | DA   |  | YDR026c | 13        | 0.9921                  | 1    |
| PHO2  | -         | -                       | DA   |  | ZAP1    | -         | -                       | DA   |
| PHO4  | 13        | 0.9678                  | 1    |  |         |           |                         |      |



Table S14. The identification results of DME, conducted after the SSR reduction.

| TF    | Frequency | Correlation coefficient | Rank |  | TF      | Frequency | Correlation coefficient | Rank |
|-------|-----------|-------------------------|------|--|---------|-----------|-------------------------|------|
| ABF1  | 18        | 0.888                   | 3    |  | RAP1    | 68        | 0.9839                  | 1    |
| ACE2  | 23        | 0.8852                  | 1    |  | RCS1    | 26        | 0.9883                  | 1    |
| AFT2  | 43        | 0.9603                  | 1    |  | RDS1    | 26        | 0.941                   | 1    |
| AZF1  | 12        | 0.9365                  | 1    |  | REB1    | 88        | 0.9801                  | 1    |
| BAS1  | 9         | 0.8958                  | 1    |  | RFX1    | 12        | 0.9707                  | 1    |
| CAD1  | 10        | 0.9773                  | 2    |  | RLR1    | 8         | 0.8477                  | 4    |
| CBF1  | 159       | 0.9688                  | 1    |  | RPN4    | 68        | 0.9991                  | 1    |
| CIN5  | 19        | 0.9575                  | 1    |  | SFP1    | 25        | 0.9814                  | 1    |
| DAL82 | -         | -                       | DA   |  | SIG1    | -         | -                       | DA   |
| DIG1  | 13        | 0.9071                  | 2    |  | SIP4    | -         | -                       | DA   |
| FHL1  | 91        | 0.9919                  | 1    |  | SKN7    | -         | -                       | DA   |
| FKH1  | 51        | 0.9713                  | 1    |  | SNT2    | 20        | 0.991                   | 1    |
| FKH2  | 36        | 0.9714                  | 1    |  | SOK2    | -         | -                       | DA   |
| GAL4  | -         | -                       | DA   |  | SPT23   | 8         | 0.8839                  | 4    |
| GAT1  | 8         | 0.9217                  | 3    |  | SPT2    | -         | -                       | DA   |
| GCN4  | 56        | 0.9637                  | 1    |  | STB1    | 18        | 0.9047                  | 1    |
| GLN3  | 18        | 0.8598                  | 1    |  | STB4    | -         | -                       | DA   |
| HAP1  | 34        | 0.8906                  | 1    |  | STB5    | 15        | 0.8997                  | 1    |
| HAP4  | 26        | 0.9735                  | 1    |  | STE12   | 39        | 0.9666                  | 1    |
| HSF1  | 56        | 0.8382                  | 1    |  | SUM1    | 21        | 0.9073                  | 1    |
| INO2  | 23        | 0.9578                  | 1    |  | SUT1    | -         | -                       | DA   |
| INO4  | 20        | 0.9819                  | 1    |  | SWI4    | 61        | 0.9642                  | 1    |
| LEU3  | 22        | 0.9343                  | 1    |  | SWI6    | 71        | 0.9                     | 1    |
| MBP1  | 71        | 0.9614                  | 1    |  | TEC1    | 11        | 0.8398                  | 1    |
| MCM1  | 26        | 0.9279                  | 1    |  | THI2    | -         | -                       | DA   |
| MET4  | 10        | 0.8482                  | 3    |  | TYE7    | 32        | 0.9801                  | 1    |
| MSN2  | 31        | 0.8937                  | 1    |  | UME1    | 8         | 0.8808                  | 5    |
| NDD1  | -         | -                       | DA   |  | UME6    | 74        | 0.9923                  | 1    |
| NRG1  | 63        | 0.9873                  | 1    |  | YAP1    | 16        | 0.979                   | 1    |
| PDR1  | -         | -                       | DA   |  | YAP7    | 27        | 0.8429                  | 1    |
| PHD1  | -         | -                       | DA   |  | YDR026c | 13        | 0.9921                  | 1    |
| PHO2  | -         | -                       | DA   |  | ZAP1    | -         | -                       | DA   |
| PHO4  | 14        | 0.9663                  | 1    |  |         |           |                         |      |

Table S15. The identification results of Weeder, without any dataset pre-treatments.

| TF    | Frequency | Correlation coefficient | Rank |  | TF      | Frequency | Correlation coefficient | Rank |
|-------|-----------|-------------------------|------|--|---------|-----------|-------------------------|------|
| ABF1  | 231       | 0.9575                  | 1    |  | RAP1    | 55        | 0.9718                  | 1    |
| ACE2  | -         | -                       | DA   |  | RCS1    | 59        | 0.9836                  | 1    |
| AFT2  | 83        | 0.9957                  | 1    |  | RDS1    | 24        | 0.9925                  | 1    |
| AZF1  | -         | -                       | DA   |  | REB1    | 88        | 0.9972                  | 1    |
| BAS1  | 44        | 0.9835                  | 1    |  | RFX1    | -         | -                       | DA   |
| CAD1  | 17        | 0.9417                  | 1    |  | RLR1    | -         | -                       | DA   |
| CBF1  | 344       | 0.9998                  | 1    |  | RPN4    | 86        | 0.9959                  | 1    |
| CIN5  | 87        | 0.9438                  | 1    |  | SFP1    | 35        | 0.9709                  | 1    |
| DAL82 | -         | -                       | DA   |  | SIG1    | -         | -                       | DA   |
| DIG1  | -         | -                       | DA   |  | SIP4    | -         | -                       | DA   |
| FHL1  | 143       | 0.9893                  | 1    |  | SKN7    | 22        | 0.8465                  | 4    |
| FKH1  | 635       | 0.9707                  | 1    |  | SNT2    | 36        | 0.9762                  | 1    |
| FKH2  | 624       | 0.9614                  | 1    |  | SOK2    | 142       | 0.8589                  | 1    |
| GAL4  | -         | -                       | DA   |  | SPT23   | 59        | 0.8006                  | 2    |
| GAT1  | -         | -                       | DA   |  | SPT2    | -         | -                       | DA   |
| GCN4  | 199       | 0.9922                  | 1    |  | STB1    | 46        | 0.9657                  | 1    |
| GLN3  | 277       | 0.9515                  | 1    |  | STB4    | 25        | 0.9224                  | 1    |
| HAP1  | -         | -                       | DA   |  | STB5    | 26        | 0.9283                  | 1    |
| HAP4  | 143       | 0.9639                  | 1    |  | STE12   | 352       | 0.9184                  | 1    |
| HSF1  | 92        | 0.8422                  | 1    |  | SUM1    | 39        | 0.9105                  | 2    |
| INO2  | 50        | 0.9608                  | 1    |  | SUT1    | 29        | 0.9151                  | 1    |
| INO4  | 30        | 0.9956                  | 1    |  | SWI4    | 83        | 0.9815                  | 1    |
| LEU3  | 14        | 0.9901                  | 1    |  | SWI6    | 169       | 0.9398                  | 1    |
| MBP1  | 186       | 0.9845                  | 1    |  | TEC1    | -         | -                       | DA   |
| MCM1  | 158       | 0.8618                  | 1    |  | THI2    | -         | -                       | DA   |
| MET4  | -         | -                       | DA   |  | TYE7    | 108       | 0.99                    | 1    |
| MSN2  | 31        | 0.9555                  | 1    |  | UME1    | -         | -                       | DA   |
| NDD1  | 58        | 0.8051                  | 2    |  | UME6    | 84        | 0.9956                  | 1    |
| NRG1  | 58        | 0.9862                  | 1    |  | YAP1    | 80        | 0.9475                  | 1    |
| PDR1  | -         | -                       | DA   |  | YAP7    | 201       | 0.9797                  | 1    |
| PHD1  | -         | -                       | DA   |  | YDR026c | 29        | 0.9961                  | 1    |
| PHO2  | -         | -                       | DA   |  | ZAP1    | -         | -                       | DA   |
| PHO4  | 54        | 0.9911                  | 1    |  |         |           |                         |      |

Table S16. The identification results of Weeder, conducted after the SSR reduction.

| TF    | Frequency | Correlation coefficient | Rank |  | TF      | Frequency | Correlation coefficient | Rank |
|-------|-----------|-------------------------|------|--|---------|-----------|-------------------------|------|
| ABF1  | 231       | 0.9575                  | 1    |  | RAP1    | 55        | 0.9718                  | 1    |
| ACE2  | -         | -                       | DA   |  | RCS1    | 44        | 0.9601                  | 1    |
| AFT2  | 83        | 0.9957                  | 1    |  | RDS1    | 22        | 0.9947                  | 1    |
| AZF1  | -         | -                       | DA   |  | REB1    | 87        | 0.9972                  | 1    |
| BAS1  | 44        | 0.9835                  | 1    |  | RFX1    | 20        | 0.9311                  | 1    |
| CAD1  | 17        | 0.9417                  | 1    |  | RLR1    | -         | -                       | DA   |
| CBF1  | 344       | 0.9998                  | 1    |  | RPN4    | 86        | 0.9959                  | 1    |
| CIN5  | 85        | 0.9438                  | 1    |  | SFP1    | 35        | 0.9955                  | 1    |
| DAL82 | -         | -                       | DA   |  | SIG1    | -         | -                       | DA   |
| DIG1  | -         | -                       | DA   |  | SIP4    | -         | -                       | DA   |
| FHL1  | 142       | 0.9895                  | 1    |  | SKN7    | -         | -                       | DA   |
| FKH1  | 603       | 0.971                   | 1    |  | SNT2    | 36        | 0.9762                  | 1    |
| FKH2  | 592       | 0.9618                  | 1    |  | SOK2    | 142       | 0.8589                  | 1    |
| GAL4  | -         | -                       | DA   |  | SPT23   | -         | -                       | DA   |
| GAT1  | -         | -                       | DA   |  | SPT2    | -         | -                       | DA   |
| GCN4  | 197       | 0.9919                  | 1    |  | STB1    | 46        | 0.9657                  | 1    |
| GLN3  | 209       | 0.9457                  | 1    |  | STB4    | 25        | 0.9224                  | 2    |
| HAP1  | -         | -                       | DA   |  | STB5    | 25        | 0.9296                  | 1    |
| HAP4  | 143       | 0.9639                  | 1    |  | STE12   | 322       | 0.92                    | 1    |
| HSF1  | 78        | 0.8545                  | 2    |  | SUM1    | 39        | 0.9105                  | 2    |
| INO2  | 49        | 0.9627                  | 1    |  | SUT1    | 29        | 0.9151                  | 1    |
| INO4  | 30        | 0.9956                  | 1    |  | SWI4    | 81        | 0.9815                  | 1    |
| LEU3  | 14        | 0.9901                  | 1    |  | SWI6    | 167       | 0.9398                  | 1    |
| MBP1  | 183       | 0.9846                  | 1    |  | TEC1    | 31        | 0.8521                  | 2    |
| MCM1  | 153       | 0.8621                  | 1    |  | THI2    | -         | -                       | DA   |
| MET4  | -         | -                       | DA   |  | TYE7    | 98        | 0.993                   | 1    |
| MSN2  | 31        | 0.9555                  | 1    |  | UME1    | -         | -                       | DA   |
| NDD1  | -         | -                       | DA   |  | UME6    | 84        | 0.9956                  | 1    |
| NRG1  | 58        | 0.9862                  | 1    |  | YAP1    | 96        | 0.9318                  | 1    |
| PDR1  | 15        | 0.9497                  | 1    |  | YAP7    | 192       | 0.9796                  | 1    |
| PHD1  | -         | -                       | DA   |  | YDR026c | 29        | 0.9961                  | 1    |
| PHO2  | -         | -                       | DA   |  | ZAP1    | -         | -                       | DA   |
| PHO4  | 54        | 0.9911                  | 1    |  |         |           |                         |      |

Table S17. The top rank motifs that were identified using the six programs, with respect to the four mammalian datasets.

| TF        | SSR reduction | MDscan |           | MEME  |           | BioProspector |           |
|-----------|---------------|--------|-----------|-------|-----------|---------------|-----------|
|           |               | Motif  | Frequency | Motif | Frequency | Motif         | Frequency |
| hER       | ×             |        | 362       |       | 288       |               | 277       |
|           | ○             |        | 779       |       | 187       |               | 667       |
| mTcfcp2l1 | ×             |        | 125       |       | 3811      |               | 2622      |
|           | ○             |        | 917       |       | 2683      |               | 2297      |
| hAR       | ×             |        | 328       |       | 823       |               | 764       |
|           | ○             |        | 228       |       | 100       |               | 426       |
| hVDR      | ×             |        | 55        |       | 110       |               | 83        |
|           | ○             |        | 362       |       | 3         |               | 236       |
| TF        | SSR reduction | Weeder |           | DME   |           | MODIC         |           |
|           |               | Motif  | Frequency | Motif | Frequency | Motif         | Frequency |
| hER       | ×             |        | 23        |       | 16        |               | 247       |
|           | ○             |        | 23        |       | 16        |               | 224       |
| mTcfcp2l1 | ×             |        | 125       |       | 8         |               | 1322      |
|           | ○             |        | 103       |       | 242       |               | 1100      |
| hAR       | ×             |        | 91        |       | 43        |               | 152       |
|           | ○             |        | 12        |       | 66        |               | 159       |
| hVDR      | ×             |        | 16        |       | 11        |               | 60        |
|           | ○             |        | 4         |       | 5         |               | 29        |

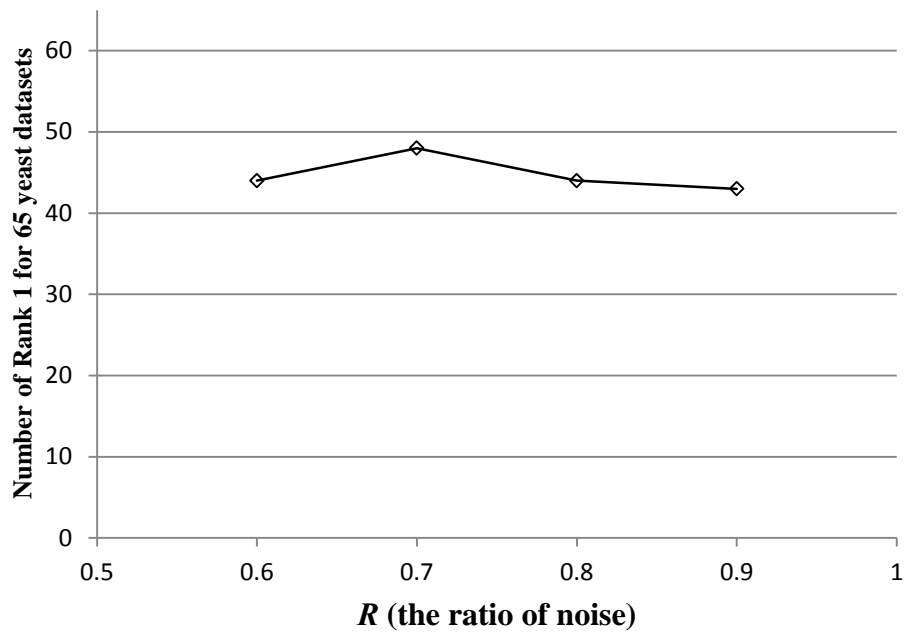

Figure S1. For the determination of the most suitable  $R$  value (i.e., the ratio of “noise”; see subsection 2.5), 0.6, 0.7, 0.8, and 0.9 were tested. As a result of the analysis, 0.7 was selected such that the number of “Rank 1” was maximized for all 65 yeast datasets.

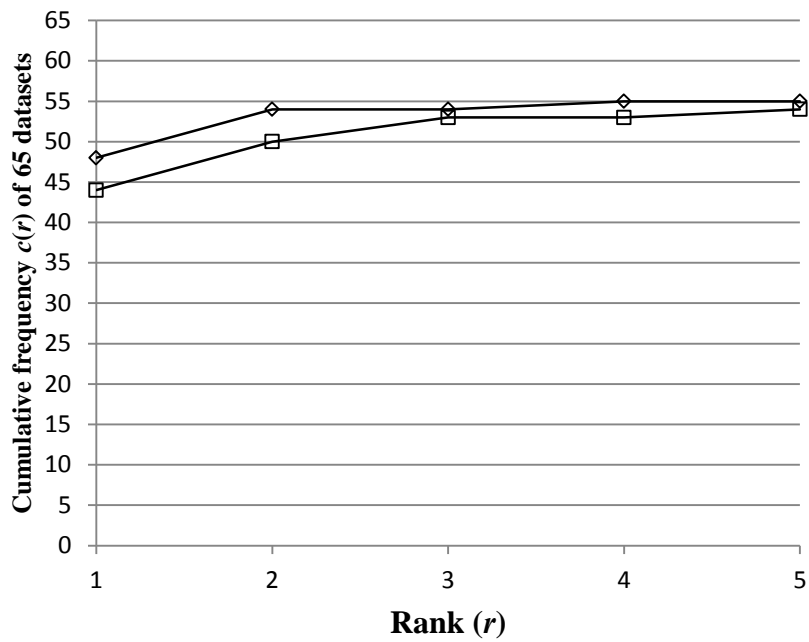

Figure S2. The cumulative frequency  $c(r)$  ( $r$  represents “Rank”, i.e.,  $r=1, \dots, 5$ ) from equation 13 is plotted with respect to our system; i.e.,  $c(r)$  of our system, without any dataset pre-treatments (rhombuses), and  $c(r)$  of our system conducted after the SSR reduction (squares).

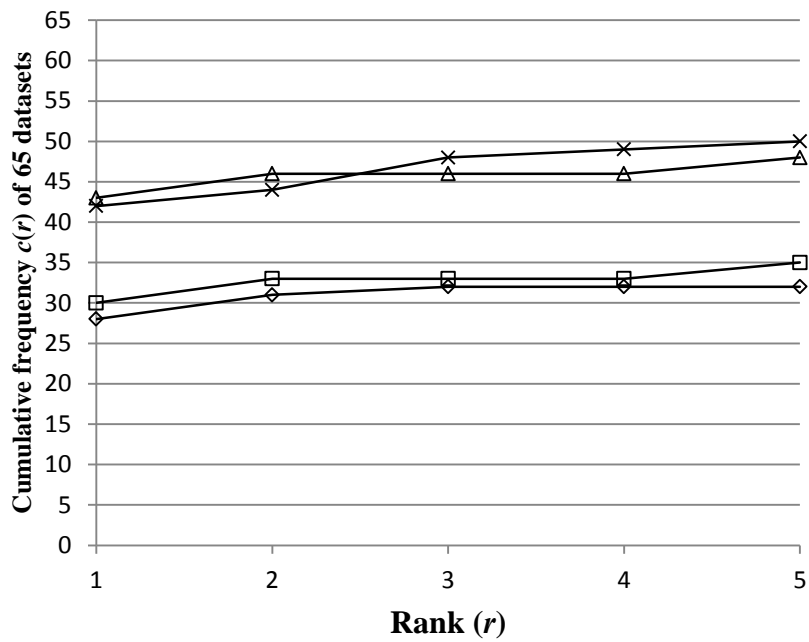

Figure S3. The cumulative frequency  $c(r)$  ( $r$  represents “Rank”, i.e.,  $r=1, \dots, 5$ ) from equation 13 is plotted with respect to our system; i.e.,  $c(r)$  of MDscan without any dataset pre-treatments (rhombuses),  $c(r)$  of MDscan conducted after the rearrangement of the target DNA fragments (triangles),  $c(r)$  of MDscan conducted after SSR reduction (squares), and  $c(r)$  of MDscan conducted after the SSR reduction and the rearrangement of the target DNA fragments (crosses).

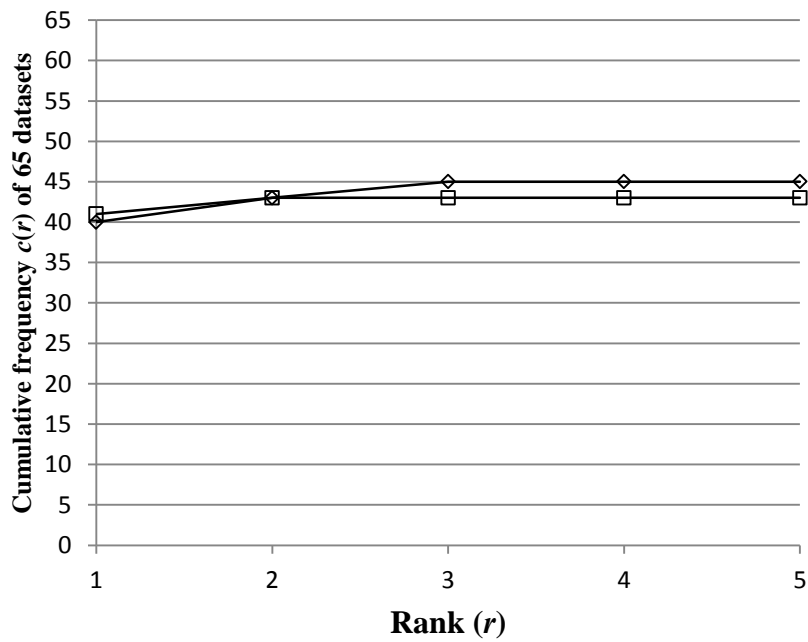

Figure S4. The cumulative frequency  $c(r)$  ( $r$  represents “Rank”, i.e.,  $r=1, \dots, 5$ ) from equation 13 is plotted with respect to BioProspector; i.e.,  $c(r)$  of BioProspector without any dataset pre-treatments (rhombuses) and  $c(r)$  of BioProspector conducted after the SSR reduction (squares).



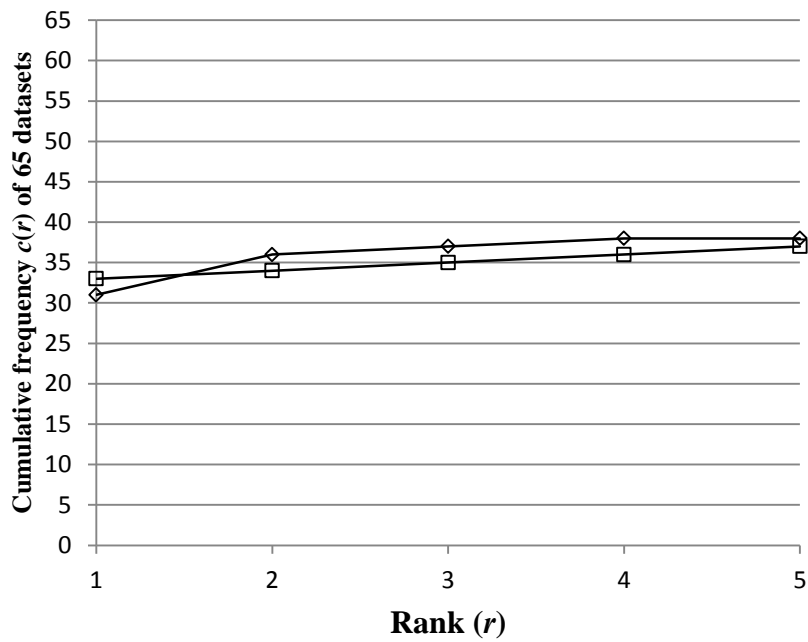

Figure S5. The cumulative frequency  $c(r)$  ( $r$  represents “Rank”, i.e.,  $r=1, \dots, 5$ ) from equation 13 is plotted with respect to MEME; i.e.,  $c(r)$  of MEME without any dataset pre-treatments (rhombuses) and  $c(r)$  of MEME conducted after the SSR reduction (squares).

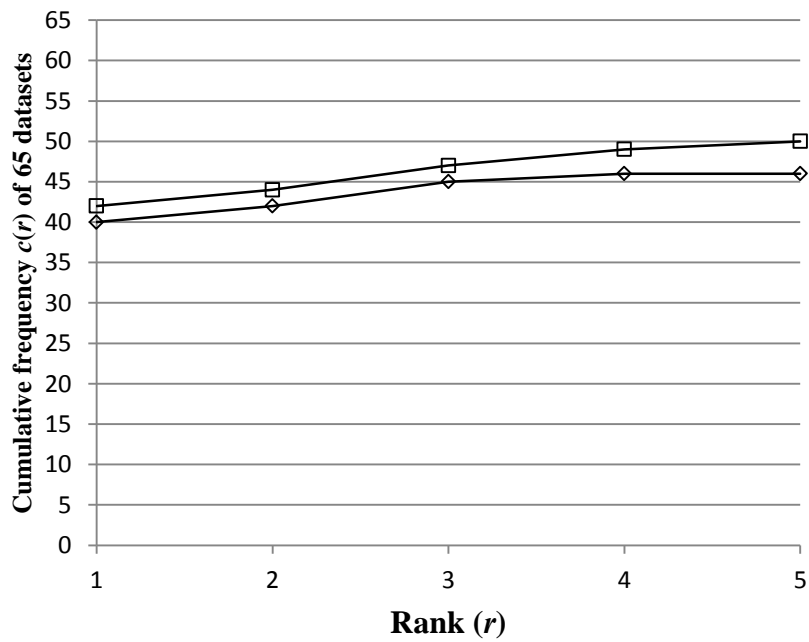

Figure S6. The cumulative frequency  $c(r)$  ( $r$  represents “Rank”, i.e.,  $r=1, \dots, 5$ ) from equation 13 is plotted with respect to DME; i.e.,  $c(r)$  of DME without any dataset pre-treatments (rhombuses) and  $c(r)$  of DME conducted after the SSR reduction (squares).

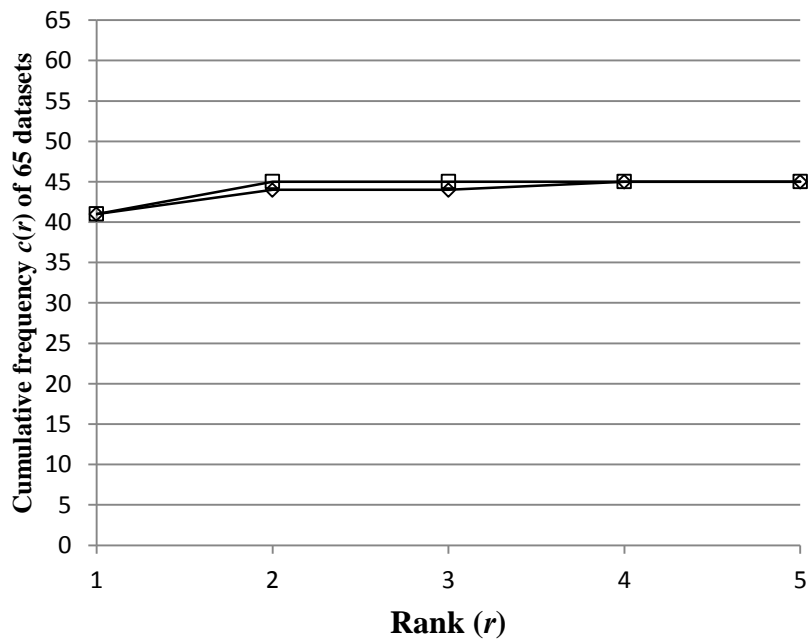

Figure S7. The cumulative frequency  $c(r)$  ( $r$  represents “Rank”, i.e.,  $r=1, \dots, 5$ ) from equation 13 is plotted with respect to Weeder; i.e.,  $c(r)$  of Weeder without any dataset pre-treatments (rhombuses) and  $c(r)$  of Weeder conducted after the SSR reduction (squares).

## ***References***

1. Harbison, C.T., Gordon, D.B., Lee, T.I., Rinaldi, N.J., Macisaac, K.D., Danford, T.W., Hannett, N.M., Tagne, J.B., Reynolds, D.B., Yoo, J. *et al.* (2004) Transcriptional regulatory code of a eukaryotic genome. *Nature*, **431**, 99-104.
2. Crooks, G.E., Hon, G., Chandonia, J.M. and Brenner, S.E. (2004) WebLogo: a sequence logo generator. *Genome Res*, **14**, 1188-1190.
